# Clinicopathological impacts of high c-Met expression in head and neck squamous cell carcinoma: a meta-analysis and review

Jung Han Kim<sup>1,\*</sup>, Bum Jun Kim<sup>1,2,\*</sup> and Hyeong Su Kim<sup>1</sup>

<sup>1</sup>Division of Hemato-Oncology, Department of Internal Medicine, Kangnam Sacred-Heart Hospital, Hallym University Medical Center, Hallym University College of Medicine, Seoul, Republic of Korea

<sup>2</sup>Department of Internal Medicine, National Army Capital Hospital, The Armed Forces Medical Command, Sungnam, Gyeonggi-do, Republic of Korea

\*These authors contributed equally to this work

**Correspondence to:** Jung Han Kim, **email:** harricil@hotmail.com, harricil@hallym.or.kr

**Keywords:** c-Met, head and neck squamous cell carcinoma, prognosis, meta-analysis, review

**Received:** July 05, 2017

**Accepted:** September 15, 2017

**Published:** September 28, 2017

**Copyright:** Kim et al. This is an open-access article distributed under the terms of the Creative Commons Attribution License 3.0 (CC BY 3.0), which permits unrestricted use, distribution, and reproduction in any medium, provided the original author and source are credited.

## ABSTRACT

**High c-Met expression has been observed in head and neck squamous cell carcinoma (HNSCC). However, its clinicopathological impact remains controversial. We performed this meta-analysis to evaluate the pathologic and prognostic impacts of c-Met overexpression in patients with HNSCC. A systematic computerized search of the electronic databases was carried out. From 16 studies, 1,948 patients with HNSCC were included in the meta-analysis. Compared with HNSCCs showing low c-Met expression, tumors with high c-Met expression were significantly associated with higher rate of lymph node metastasis (odds ratio = 3.26, 95% CI: 2.27–4.69,  $P < 0.00001$ ) and higher T stage (odds ratio = 1.33, 95% CI: 1.03–1.71,  $P = 0.03$ ). In addition, patients with c-Met-high HNSCC showed significantly worse disease-free survival (hazard ratio = 1.49, 95% CI: 1.04–2.14,  $P = 0.03$ ) and overall survival (hazard ratio = 1.83, 95% CI: 1.29–2.60,  $P = 0.0007$ ) than those with c-Met-low tumor. In conclusion, this meta-analysis demonstrates that high c-Met expression is significantly associated with worse pathological features and prognosis, indicating c-Met overexpression is an adverse prognostic marker for patients with HNSCC.**

## INTRODUCTION

Head and neck cancers (HNCs) are classified as epithelial neoplasms of the oral cavity (including tongue and tonsils), nasal cavity, paranasal sinuses, pharynx, and larynx. HNCs have been increasing worldwide, comprising one of the most common groups of cancer [1–3]. Despite the heterogeneity both in tumor location and genetic aberrations, histologically 90% of HNCs are squamous cell carcinoma (HNSCC). About two-thirds of patients with HNSCC are presented with advanced diseases at the time of diagnosis. Treatments of patients with advanced HNSCC usually involve the multitude of therapeutic modalities such as surgical resection, radiation, or concurrent chemoradiation. Although initial treatments are generally intended to give the chance to cure for patients with advanced HNSCC, however, these tumors are characterized by frequent recurrence or metastasis as

well as resistance to the conventional chemoradiotherapy. Moreover, patients with recurrent or metastatic HNSCC have shown dismal outcomes [4].

With understanding of molecular mechanisms of carcinogenesis, treatment of recurrent or metastatic HNSCC has changed over the last decade. Cetuximab, a monoclonal antibody to the epidermal growth factor receptor (EGFR), was the first to receive FDA approval with survival advantage when combined with radiation or platinum-based chemotherapy [5, 6]. In 2016, pembrolizumab and nivolumab, immune checkpoint inhibitors, also received FDA approval for patients with recurrent or metastatic HNSCC. These monoclonal antibodies have shown a survival benefit when compared with standard care of chemotherapies [7, 8]. However, most tumors develop resistance to the molecular targeted agents and their survival advantages are still disappointing. Therefore, there is still a need to identify novel therapeutic

targets promoting HNSCC pathogenesis and develop more efficacious targeted agents. The c-Met/hepatocyte growth factor (HGF) pathway has recently emerged as a potential therapeutic target in various tumors including HNSCC [9, 10].

c-Met, the tyrosine kinase receptor for HGF, is encoded by the proto-oncogene *MET* located on chromosome 7 [11]. The dysregulation of the HGF/c-Met signaling pathway has been implicated in the pathogenesis of cancer, such as tumor cell proliferation and survival, invasion, and metastasis [12, 13]. In addition to amplification, mutation, or transcriptional alteration of *MET*, c-Met may be activated by protein overexpression or paracrine/autocrine signaling of HGF [14–16]. The overexpression of c-Met has been observed in various types of tumors, such as hepatocellular carcinoma [16], breast cancer [17], lung cancer [18], gastric cancer [19], colorectal cancer [20], cervical cancer [21], renal cell carcinoma [22], and pancreatic cancer [23].

The expression of c-Met has also been detected in HNSCC [24–45]. Many studies have reported that high c-Met expression is significantly associated with poor pathologic features and/or prognosis in HNSCC. Because of the small number of patients and variability of detection methods in most studies, however, there have been some conflicts regarding its pathologic or prognostic impact [36, 39, 40]. We conducted this meta-analysis to evaluate the clinicopathological roles of high c-Met expression in patients with HNSCC.

## RESULTS

### Results of search

Figure 1 shows flow diagram of search process. A total of 325 potentially relevant studies were initially found, but 303 of them were excluded after screening the titles and abstracts. Of the remaining 22 potentially eligible studies, 6 were further excluded by the inclusion criteria: three had no definite criteria for high c-Met expression [24–26]; two had no available data to estimate hazard ratio (HR) or odds ratio (OR) with 95% confidence interval (CI) [27, 28]; one included duplicated data [29]. Finally, sixteen studies were included in the meta-analysis [30–45].

### Characteristics of the included studies

Supplementary Table 1 summarizes the main characteristics and clinicopathological findings of the included studies. Most studies were performed retrospectively. From the 16 studies, 1,948 patients were included in the meta-analysis. Except for one with recurrent or metastatic HNSCCs [43], most studies had patients with a locoregionally advanced disease.

In 13 studies [30–40, 44, 45], patients underwent surgical resection without neoadjuvant therapy. In two studies [41, 42], patients were treated with concurrent chemoradiation or radiation alone as a first-line treatment.

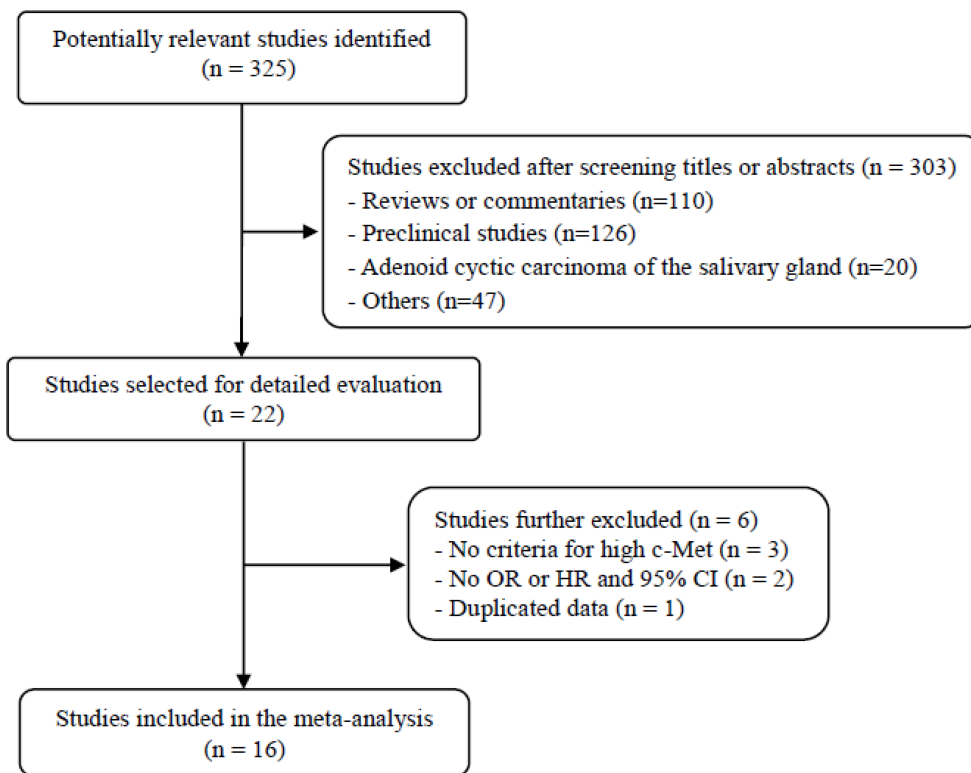

Figure 1: Flow diagram of search process.

All the studies used immunohistochemistry (IHC) to assess c-Met expression status but adopted various cutoff values for high c-Met expression.

### c-Met expression assignment

There was a marked heterogeneity in the criteria used to dichotomize c-Met expression status (low or high) among studies. The IHC criteria were briefly summarized in the Supplementary Table 1. The rates of high c-Met expression were various, ranging from 26% [31] to 82.9% [36].

### Impact of high c-Met expression on pathological features

From nine studies [30–33, 35–39], 795 patients were included in the meta-analysis of odds ratios (ORs) with 95% confidence intervals (CIs) for lymph node (LN) metastasis. Compared with HNSCCs with low c-Met expression, tumors with high c-Met expression showed significantly higher rate of LN metastasis (OR = 3.26 [95% CI, 2.27–4.69],  $P < 0.00001$ ) (Figure 2A). The fixed-effects model was selected because there was no significant heterogeneity among studies ( $X^2 = 6.51$ ,  $P = 0.59$ ,  $I^2 = 0\%$ ).

From eleven studies [30, 32, 33, 35, 36, 39–42, 44], 1,611 patients were included in the meta-analysis of ORs with 95% CIs for tumor T stage. There was a positive correlation between c-Met overexpression and higher T classification (T3 and T4) (OR = 1.33 [95% CI,

1.03–1.71],  $P = 0.03$ ) (Figure 2B). The fixed-effects model was used because there was little heterogeneity among studies ( $X^2 = 17.52$ ,  $P = 0.06$ ,  $I^2 = 43\%$ ).

### Impact of high c-Met expression on survival

From 9 studies [32, 35, 37, 39–42, 44, 45], 1,263 patients were included in the meta-analysis of HRs with 95% CIs for disease-free survival (DFS). Patients with c-Met-high HNSCC showed significantly worse DFS than those with c-Met-low tumor (HR = 1.49 [95% CI, 1.04–2.14],  $P = 0.03$ ) (Figure 3A). The random-effects model was selected because there was a significant heterogeneity across the studies ( $X^2 = 16.22$ ,  $P = 0.04$ ,  $I^2 = 51\%$ ).

From 12 studies [31, 34–40, 42–45], 1,529 patients were included in the meta-analysis of HRs with 95% CIs for overall survival (OS). Patients with c-Met-high HNSCC showed significantly poor OS (HR = 1.83 [95% CI, 1.29–2.60],  $P = 0.0007$ ) (Figure 3B), compared with those with c-Met-low tumor. The random-effects model was used because there was a significant heterogeneity across the studies ( $X^2 = 23.12$ ,  $P = 0.02$ ,  $I^2 = 52\%$ ).

### Publication bias

Visual inspection of the funnel plots for LN metastasis, T stage, DFS and OS showed symmetry, indicating there were no substantial publication biases (Figure 4A–4D).

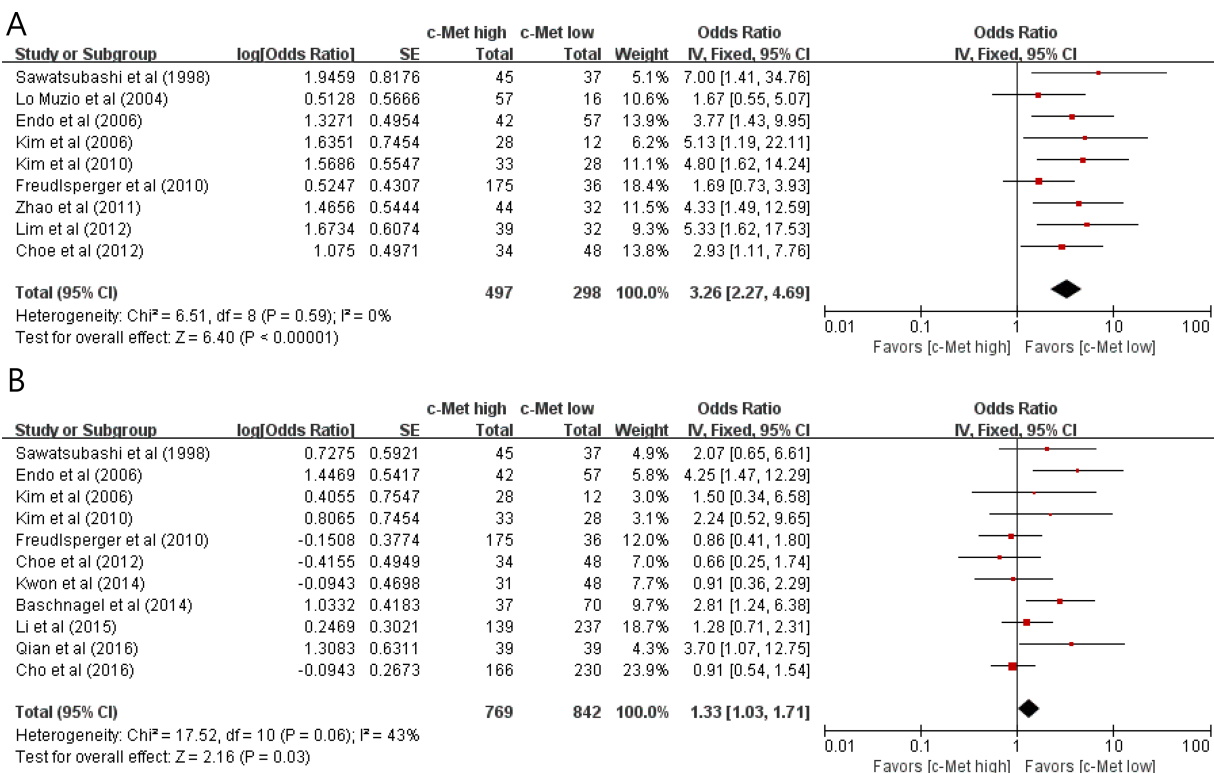

Figure 2: Forest plots of odds ratios for lymph node metastasis (A) and T stage (B).

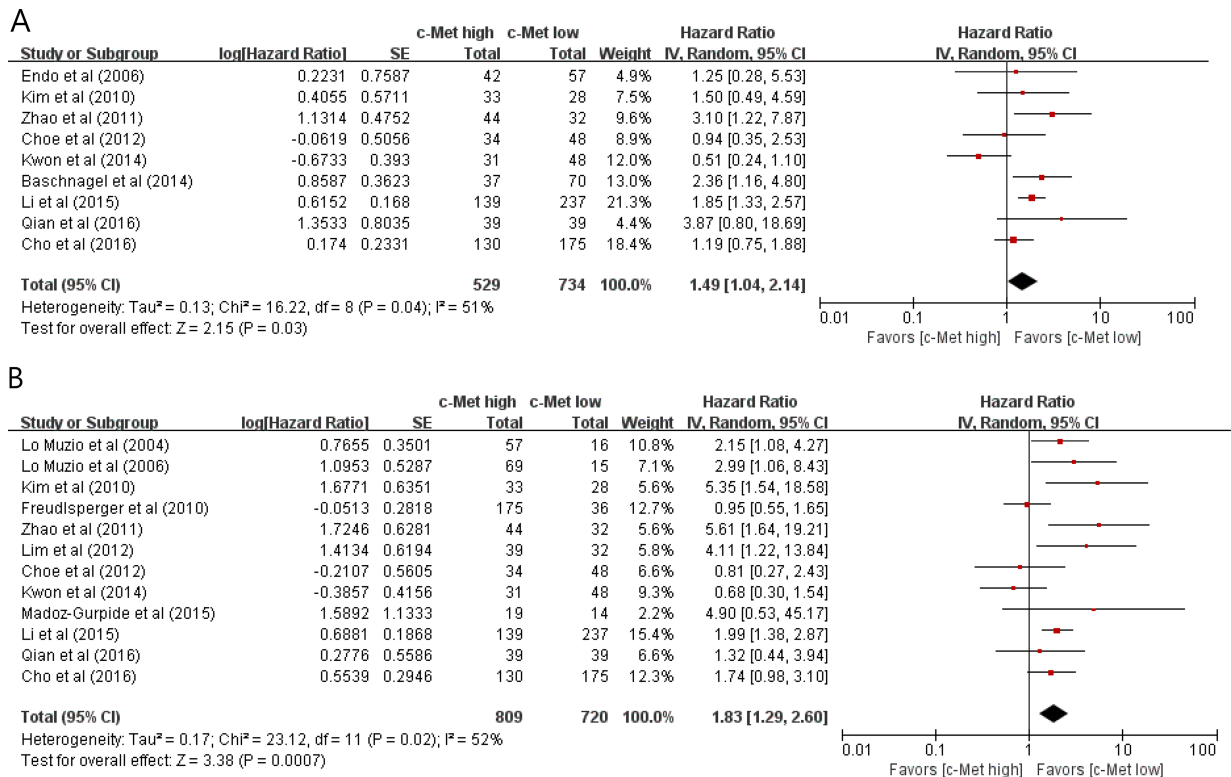

Figure 3: Forest plots of hazard ratios for disease-free survival (A) and overall survival (B).

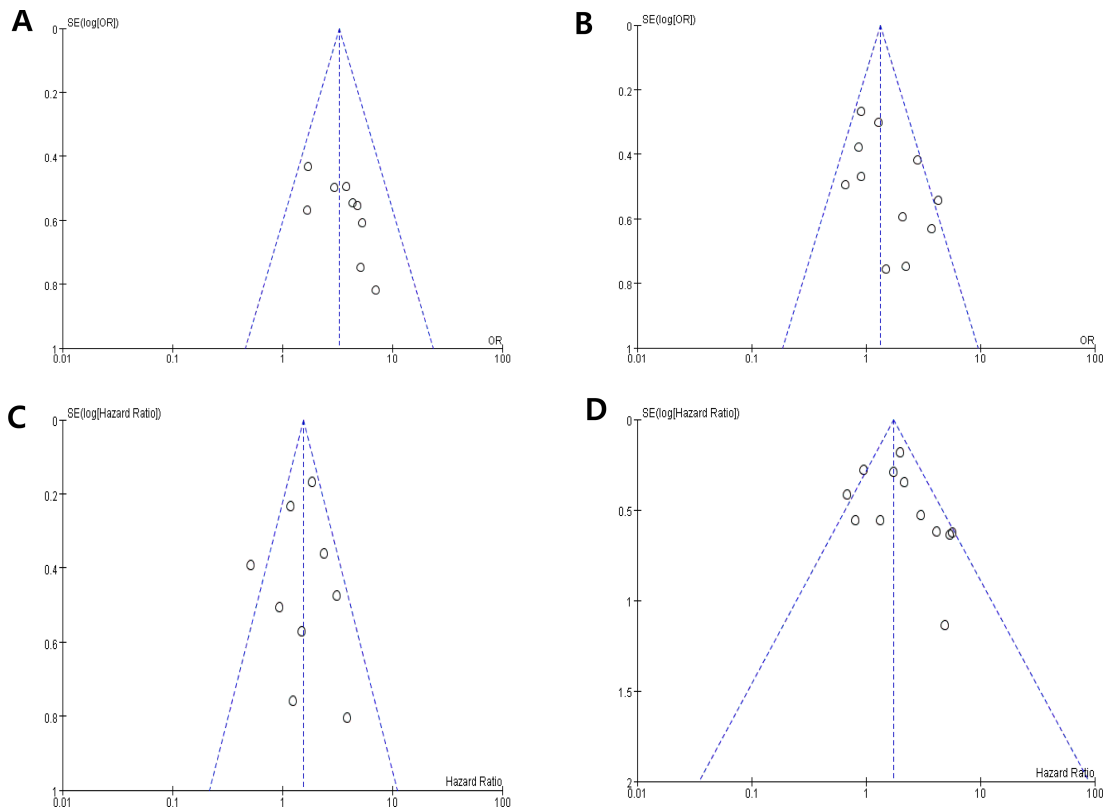

Figure 4: Funnel plots for publication bias regarding lymph node metastasis (A), T stage (B), disease-free survival (C) and overall survival (D).

## DISCUSSION

In this meta-analysis, we investigated the pathologic and prognostic impact of high c-Met expression in patients with HNSCC. The results show that c-Met overexpression significantly correlated with poor pathological features and prognosis. To our knowledge, this is the first meta-analysis to evaluate the clinicopathological impacts of high c-Met expression in patients with HNSCC.

*MET* activation has been proven to play a critical role in the pathogenesis and progression of many tumor types [14–16]. Mechanisms of *MET* activation include mutations, amplification, and overexpression of both c-Met and HGF protein [15, 16]. *MET* amplification has been detected in up to 13% of tumors and *MET* mutations are less common in HNSCCs [46, 47]. *MET* amplification has been proposed as an independent prognostic factor for DFS and OS in locoregionally advanced HNSCC [42]. While *MET* amplification and increased *MET* gene copy number have been detected at a low frequency in HNSCC tumors, they are associated with the overexpression of c-Met protein [43, 45]. c-Met overexpression is the most frequently observed alteration presenting in up to 80% in HNSCCs [34, 36]. Many studies in HNSCC have suggested that c-Met expression is correlated with clinicopathological parameters indicative of poor prognosis, such as differentiation [39], T classification [25, 41, 44], LN metastasis [25, 30, 33, 35, 37–39], disease stage [25, 32, 35], and worse DFS [24, 37, 41, 42] or OS [24, 31, 34, 35, 37, 38, 42]. However, the pathological or clinical impacts of c-Met expression were not consistent across the studies [26–28, 32, 36, 39, 40, 45]. For example, Freudlsperger *et al.* evaluated c-Met expression in 211 patients with oral cavity SCC and failed to find any prognostic impact in regard to tumor size or stage, LN metastasis, and OS [36]. Potential explanations for these discrepancies may stem from the heterogeneity of patients and diverse primary tumor sites. In addition, most studies had a small number of patients and adopted different cut-off values for high versus low c-Met expression levels.

In the current meta-analysis, we included studies comparing the major pathological features (LN metastasis and T classification) and survival outcomes (DFS and OS) according to the c-Met expression status. All the studies used IHC to test c-Met expression. Compared with HNSCCs showing low c-Met expression, tumors with high expression showed significantly higher rate of LN metastasis (OR = 3.26,  $P < 0.00001$ ) and higher T-stage (OR = 1.33,  $P = 0.03$ ). In addition, patients with c-Met-high HNSCC showed significantly worse DFS (HR = 1.49,  $P = 0.03$ ) and OS (HR = 1.83,  $P = 0.0007$ ) than those with c-Met-low tumor. Our findings indicate that high c-Met expression represent a significant adverse prognostic marker in patients with HNSCC.

Several meta-analyses in other cancers have also defined high c-Met expression as an adverse prognostic

marker for survival [17–21]. Therefore, inhibition of c-Met/HGF signaling may provide an effective therapeutic strategy for cancers showing high c-Met expression [9, 10, 48]. With ample evidence for the role of the c-Met/HGF pathway promoting tumor progression, various c-Met inhibitors are under active investigation in a variety of cancers, including HNSCC [48–52]. Seiwert *et al.* conducted the first phase II trial to evaluate a c-Met inhibitor in HNSCCs [49]. They tested the efficacy and safety of single agent foretinib (a multi-kinase inhibitor targeting c-Met, VEGF2, RON, AXL, and TIE-2 receptors) in patients with recurrent or metastatic HNSCC. Although no patients achieved objective response, half of the patients (7/14) showed stable disease, with minor tumor shrinkage in 6. The predictive role of c-Met expression could not be evaluated due to the small sample size, but the results supported the further investigation of c-Met inhibitors for HNSCC. Interestingly, the efficacy of c-Met-targeting agents has been associated with high c-Met expression in other tumors including non-small-cell lung cancer, hepatocellular carcinoma, and renal cell carcinoma [50–52]. These results suggest that patients with cancer showing high c-Met expression may be good candidates for c-Met inhibitors.

Human papillomavirus (HPV) and EGFR are biomarkers that have been extensively studied in HNSCCs. Some studies have suggested that aberrant c-Met/HGF signaling is associated with HPV status [41, 44]. Qian *et al.* reported that high c-Met expression was associated with HPV-positive status in patients with oropharyngeal SCC [44]. In the study of patients with locally advanced HNSCC treated with chemoradiation by Baschnagel *et al.*, high c-Met expression predicted for worse DFS in p16-negative patients but not in those with p16-positive tumor [41]. However, there was no significant correlation between c-Met expression and HPV status in other studies [39, 40, 45]. EGFR is highly overexpressed and correlates with disease progression in HNSCC [53]. In the study by Baschnagel *et al.* high c-Met expression was associated with EGFR positivity [41]. However, c-Met overexpression was prognostic in both EGFR-positive and EGFR-negative patients. Unfortunately, we could not include HPV status and EGFR status in this meta-analysis because of limited data available.

Recently, c-Met activation has been proposed as a potential mode of resistance to anti-EGFR therapy in HNSCC [54–57]. The c-Met/HGF signaling pathway has cross-talks with the EGFR network at both PI3K/Akt and MAPK nodes, suggesting mutual compensation. c-Met has been observed to be coexpressed with EGFR in HNSCC cell lines [56] and it has been identified as a marker of cisplatin and erlotinib resistance [54, 57]. In a retrospective study of recurrent or metastatic HNSCCs treated with cetuximab, patients with c-Met overexpression showed a significantly worse progression-free survival (HR = 7.6 [95% CI, 4.6–10.4],  $P = 0.06$ ) and OS (HR = 4.9 [95%

CI, 0.1–8.5],  $P = 0.07$ ] [43]. These findings indicate that c-Met expression may serve as a biomarker to predict who benefit less from anti-EGFR therapy. In preclinical models of HNSCC, in addition, knockdown of c-Met has enhanced sensitivity of cancer cells to anti-EGFR agents [54, 55]. These results suggest that c-Met inhibitors may overcome resistance to anti-EGFR therapy in recurrent or metastatic HNSCC.

The major challenge for clinical development of c-Met inhibitors is that there is no consensus of the reliable criteria for c-Met overexpression. A variety of methods, such as IHC, Western blot, fluorescence *in situ* hybridization, and real-time quantitative PCR are currently used to test c-Met expression, but there are no standardized criteria for overexpression. The discrepancies in the clinicopathological impacts of c-Met among studies might be attributable to the different methods and criteria for high c-Met expression. Therefore, the definition of reliable criteria for c-Met status is essential to verify the prognostic role of c-Met expression and investigate the efficacy of c-Met inhibitors.

Our study has several inherent limitations. First, the included studies had various primary sites in the head and neck. Second, because of the limited number of studies, we could not perform subgroup analyses according to the primary sites and HPV status. Third, most studies were retrospectively carried out. Fourth, although almost all patients had SCC of the head and neck, some studies included patients with undifferentiated carcinoma; however, because they occupied only a very small portion of patients, inclusion of these patients does not seem to affect the results. Fifth, while most studies had patients with a locoregionally advanced disease, one was conducted in recurrent or metastatic setting [43]. Because this study met the inclusion criteria, providing the survival data according to c-Met status, we included it in the meta-analysis of OS. Finally, as we mentioned above, the studies used different IHC methods to test c-Met expression and adopted various cut-off values to stratify c-Met status.

In conclusion, this meta-analysis demonstrates that c-Met overexpression is significantly associated with poor pathological features and prognosis. These findings indicate that high c-Met expression is a potential adverse prognostic marker for patients with HNSCC. However, larger studies using standardized methods and criteria are still needed to verify the prognostic role of c-Met expression in HNSCC with various primary sites.

## MATERIALS AND METHODS

### Search strategy

This study was performed according to the Preferred Reporting Items for Systematic Reviews and Meta-Analyses (PRISMA) guidelines [58]. We carried out a computerized electronic search of the databases such

as PubMed, Embase, and Google Scholar (up to May 2017). The search used the following keyword: “c-Met” or “Met”, “hepatocyte growth factor receptor”, and “head and neck cancer” or “head and neck squamous cell carcinoma”. The related articles function of the PubMed was also used to identify all relevant articles. The titles and abstracts of retrieved studies were carefully scanned to exclude irrelevant papers. Then, the potentially eligible articles were reviewed in full text and those that did not meet the selection criteria were further excluded. For the potential duplicate articles, only the most complete study was included.

### Inclusion criteria

Eligible studies were required to meet the following inclusion criteria: (i) patients had a pathological diagnosis of head and neck squamous cell carcinoma; (ii) articles had criteria for high c-Met expression; (iii) pathological features (LN metastasis or T classification) and/or survival outcomes (DFS or OS) were stratified according to c-Met expression status; (iv) sufficient data were provided to estimate OR or HR with 95% CI; (v) articles were published in English.

### Data extraction

The data were collected independently by two investigators (BJK and HSK). If these two authors did not agree, the other investigator (JHK) was consulted to resolve the discrepancies.

The following data were extracted from all eligible studies: the first author’s name, publication year, country, number of patients, tumor sites, T classification, LN metastasis, primary treatment, methods to test c-Met expression, cut-off values adopted to dichotomize c-Met expression status, and HR with 95% CI for DFS or OS and OR with 95% CI for pathological features.

### Statistical analysis

Statistical values were obtained directly from the original articles. If OR or HR with 95% CI were not provided, the Engauge Digitizer (version 9.1) was used to estimate the needed data from the results and Kaplan-Meier curves. The strength of the association between c-Met overexpression and pathologic features (LN metastasis or T stage) was shown as ORs with their 95% CIs. The effect size of DFS and OS was pooled through HR with its 95% CI. The heterogeneity across studies was tested by the  $Q$  statistic and the  $I^2$  inconsistency test. The fixed-effects model (Mantel–Haenszel method) was selected for pooling homogeneous outcomes when  $P \geq 0.1$  and  $I^2 \leq 50\%$ , whereas the random-effects model (DerSimonian–Laird method) was applied when there was a significant heterogeneity ( $P < 0.1$  and  $I^2 > 50\%$ ). The

RevMan software (version 5.2) was used to combine data and report outcomes. All *P*-values were two-sided and *P* < 0.05 was considered statistically significant. Publication bias was assessed graphically by the funnel plot method [59].

## ACKNOWLEDGMENTS AND FUNDING

This work had no specific funding support.

## CONFLICTS OF INTEREST

All authors have declared no competing interest.

## REFERENCES

1. Fitzmaurice C, Allen C, Barber RM, Barregard L, Bhutta ZA, Brenner H, Dicker DJ, Chimed-Orchir O, Dandona R, Dandona L, Fleming T, Forouzanfar MH, Hancock J, et al, and Global Burden of Disease Cancer Collaboration. Global, regional, and national cancer incidence, mortality, years of life lost, years lived with disability, and disability-adjusted life-years for 32 cancer groups, 1990 to 2015: asystematic analysis for the global burden of disease study. *JAMA Oncol.* 2017; 3:524–48.
2. Jung KW, Won YJ, Oh CM, Kong HJ, Lee DH, Lee KH; Community of Population-Based Regional Cancer Registries. Cancer statistics in Korea: incidence, mortality, survival, and prevalence in 2014. *Cancer Res Treat.* 2017; 49:292–305.
3. Siegel RL, Miller KD, Jemal A. Cancer statistics, 2016. *CA Cancer J Clin.* 2016; 66:7–30.
4. Colevas AD. Systemic therapy for metastatic or recurrent squamous cell carcinoma of the head and neck. *J Natl Compr Canc Netw.* 2015; 13:e37–48.
5. Bonner JA, Harari PM, Giralt J, Azarnia N, Shin DM, Cohen RB, Jones CU, Sur R, Raben D, Jassem J, Ove R, Kies MS, Baselga J, et al. Radiotherapy plus cetuximab for squamous-cell carcinoma of the head and neck. *N Engl J Med.* 2006; 354:567–78.
6. Vermorken JB, Mesia R, Rivera F, Remenar E, Kawecki A, Rottey S, Erfan J, Zabolotny D, Kienzer HR, Cupissol D, Peyrade F, Benasso M, Vynnychenko I, et al. Platinum-based chemotherapy plus cetuximab in head and neck cancer. *N Engl J Med.* 2008; 359:1116–27.
7. Seiwert TY, Burtness B, Mehra R, Weiss J, Berger R, Eder JP, Heath K, McClanahan T, Lunceford J, Gause C, Cheng JD, Chow LQ. Safety and clinical activity of pembrolizumab for treatment of recurrent or metastatic squamous cell carcinoma of the head and neck (KEYNOTE-012): an open-label, multicentre, phase 1b trial. *Lancet Oncol.* 2016; 17:956–65.
8. Ferris RL, Blumenschein G Jr, Fayette J, Guigay J, Colevas AD, Licitra L, Harrington K, Kasper S, Vokes EE, Even C, Worden F, Saba NF, Iglesias Docampo LC, et al. Nivolumab for recurrent squamous-cell carcinoma of the head and neck. *N Engl J Med.* 2016; 375:1856–67.
9. Blumenschein GR Jr, Mills GB, Gonzalez-Angulo AM. Targeting the hepatocyte growth factor-cMET axis in cancer therapy. *J ClinOncol.* 2012; 30:3287–96.
10. Rothenberger NJ, Stabile LP. Hepatocyte growth factor/c-Met signaling in head and neck cancer and implications for treatment. *Cancer.* 2017; 9.pii: E39.
11. Furge KA, Zhang YW, Vande Woude GF. Met receptor tyrosine kinase: enhanced signaling through adapter proteins. *Oncogene.* 2000; 19:5582–9.
12. Gentile A, Trusolino L, Comoglio PM. The Met tyrosine kinase receptor in development and cancer. *Cancer Metastasis Rev.* 2008; 27:85–94.
13. Zhang YW, Su Y, Volpert OV, Vande Woude GF. Hepatocyte growth factor/scatter factor mediates angiogenesis through positive VEGF and negative thrombospondin 1 regulation. *Proc Natl Acad Sci USA.* 2003;100:12718–23.
14. Kentsis A, Reed C, Rice KL, Sanda T, Rodig SJ, Tholouli E, Christie A, Valk PJ, Delwel R, Ngo V, Kutok JL, Dahlberg SE, Moreau LA, et al. Autocrine activation of the MET receptor tyrosine kinase in acute myeloid leukemia. *Nat Med.* 2012; 18:1118–22.
15. Danilkovitch-Miagkova A, Zbar B. Dysregulation of Met receptor tyrosine kinase activity in invasive tumors. *J Clin Invest.* 2002; 109:863–7.
16. Kim JH, Kim HS, Kim BJ, Jang HJ, Lee J. Prognostic value of c-Met overexpression in hepatocellular carcinoma: a meta-analysis and review. *Oncotarget.* 2017; 8:90351–90357. <https://doi.org/10.18632/oncotarget.20087>.
17. Yan S, Jiao X, Zou H, Li K. Prognostic significance of c-Met in breast cancer: a meta-analysis of 6010 cases. *Diagn Pathol.* 2015; 10:62.
18. Pyo JS, Kang G, Cho WJ, Choi SB. Clinicopathological significance and concordance analysis of c-MET immunohistochemistry in non-small cell lung cancers: A meta-analysis. *Pathol Res Pract.* 2016; 212:710–6.
19. Yu S, Yu Y, Zhao N, Cui J, Li W, Liu T. C-Met as a prognostic marker in gastric cancer: a systematic review and meta-analysis. *PLoS One.* 2013; 8:e79137.
20. Liu Y, Yu XF, Zou J, Luo ZH. Prognostic value of c-Met in colorectal cancer: a meta-analysis. *World J Gastroenterol.* 2015; 21:3706–10.
21. Peng J, Qi S, Wang P, Li W, Liu C, Li F. Diagnosis and prognostic significance of c-Met in cervical cancer: a meta-analysis. *Dis Markers.* 2016; 2016:6594016.
22. Kim JH, Kim BJ, Kim HS. Clinicopathological impacts of high c-Met expression in renal cell carcinoma: a meta-analysis and review. *Oncotarget.* 2017; 8:75478–75487. <https://doi.org/10.18632/oncotarget.20796>.
23. Kim JH, Kim HS, Kim BJ, Lee J, Jang HJ. Prognostic value of c-Met overexpression in pancreatic adenocarcinoma: a

- meta-analysis. *Oncotarget*. 2017; 8:73098–73104. <https://doi.org/10.18632/oncotarget.20392>.
24. Aebersold DM, Kollar A, Beer KT, Laissue J, Greiner RH, Djonov V. Involvement of the hepatocyte growth factor/scatter factor receptor c-met and of Bcl-xL in the resistance of oropharyngeal cancer to ionizing radiation. *Int J Cancer*. 2001; 96:41–54.
  25. Chen YS, Wang JT, Chang YF, Liu BY, Wang YP, Sun A, Chiang CP. Expression of hepatocyte growth factor and c-met protein is significantly associated with the progression of oral squamous cell carcinoma in Taiwan. *J Oral Pathol Med*. 2004; 33:209–17.
  26. Brusevold IJ, Sølund TM, Khuu C, Christoffersen T, Bryne M. Nuclear and cytoplasmic expression of Met in oral squamous cell carcinoma and in an organotypic oral cancer model. *Eur J Oral Sci*. 2010; 118:342–9.
  27. Lacroix L, Post SF, Valent A, Melkane AE, Vielh P, Egile C, Castell C, Larois C, Micallef S, Saulnier P, Goulaouic H, Lefebvre AM, Temam S. MET genetic abnormalities unreliable for patient selection for therapeutic intervention in oropharyngeal squamous cell carcinoma. *PLoS One*. 2014; 9:e84319.
  28. Yücel OT, Sungur A, Kaya S. c-met overexpression in supraglottic laryngeal squamous cell carcinoma and its relation to lymph node metastases. *Otolaryngol Head Neck Surg*. 2004; 130:698–703.
  29. Bschnagel AM, Tonlaar N, Eskandari M, Kumar T, Williams L, Hanna A, Pruetz BL, Wilson GD. Combined CD44, c-MET, and EGFR expression in p16-positive and p16-negative head and neck squamous cell carcinomas. *J Oral Pathol Med*. 2017; 46:208–213.
  30. Sawatsubashi M, Sasatomi E, Mizokami H, Tokunaga O, Shin T. Expression of c-Met in laryngeal carcinoma. *Virchows Arch*. 1998; 432:331–5.
  31. Lo Muzio L, Leonardi R, Mignogna MD, Pannone G, Rubini C, Pieramici T, Trevisiol L, Ferrari F, Serpico R, Testa N, De Rosa G, Staibano S. Scatter factor receptor (c-Met) as possible prognostic factor in patients with oral squamous cell carcinoma. *Anticancer Res*. 2004; 24:1063–9.
  32. Endo K, Shirai A, Furukawa M, Yoshizaki T. Prognostic value of cell motility activation factors in patients with tongue squamous cell carcinoma. *Hum Pathol*. 2006; 37:1111–6.
  33. Kim CH, Moon SK, Bae JH, Lee JH, Han JH, Kim K, Choi EC. Expression of hepatocyte growth factor and c-Met in hypopharyngeal squamous cell carcinoma. *Acta Otolaryngol*. 2006; 126:88–94.
  34. Lo Muzio L, Farina A, Rubini C, Coccia E, Capogreco M, Colella G, Leonardi R, Campisi G, Carinci F. Effect of c-Met expression on survival in head and neck squamous cell carcinoma. *Tumour Biol*. 2006; 27:115–21.
  35. Kim CH, Koh YW, Han JH, Kim JW, Lee JS, Baek SJ, Hwang HS, Choi EC. c-Met expression as an indicator of survival outcome in patients with oral tongue carcinoma. *Head Neck*. 2010; 32:1655–64.
  36. Freudlsperger C, Alexander D, Reinert S, Hoffmann J. Prognostic value of c-Met expression in oral squamous cell carcinoma. *Exp Ther Med*. 2010; 1:69–72.
  37. Zhao D, Wang SH, Feng Y, Hua CG, Zhao J, Tang XF. Intratumoral c-Met expression is associated with vascular endothelial growth factor C expression, lymphangiogenesis, and lymph node metastasis in oral squamous cell carcinoma: implications for use as a prognostic marker. *Hum Pathol*. 2011; 42:1514–23.
  38. Lim YC, Han JH, Kang HJ, Kim YS, Lee BH, Choi EC, Kim CH. Overexpression of c-Met promotes invasion and metastasis of small oral tongue carcinoma. *Oral Oncol*. 2012; 48:1114–9.
  39. Choe JY, Yun JY, Nam SJ, Kim JE. Expression of c-Met Is Different along the Location and Associated with Lymph Node Metastasis of Head and Neck Carcinoma. *Korean J Pathol*. 2012; 46:515–22.
  40. Kwon MJ, Kim DH, Park HR, Shin HS, Kwon JH, Lee DJ, Kim JH, Cho SJ, Nam ES. Frequent hepatocyte growth factor overexpression and low frequency of c-Met gene amplification in human papillomavirus-negative tonsillar squamous cell carcinoma and their prognostic significances. *Hum Pathol*. 2014; 45:1327–38.
  41. Baschnagel AM, Williams L, Hanna A, Chen PY, Krauss DJ, Pruetz BL, Akervall J, Wilson GD. c-Met expression is a marker of poor prognosis in patients with locally advanced head and neck squamous cell carcinoma treated with chemoradiation. *Int J Radiat Oncol Biol Phys*. 2014; 88:701–7.
  42. Li Y, Li W, He Q, Xu Y, Ren X, Tang X, Wen X, Yang X, Sun Y, Zeng J, Yun J, Liu N, Ma J. Prognostic value of MET protein overexpression and gene amplification in locoregionally advanced nasopharyngeal carcinoma. *Oncotarget*. 2015; 6:13309–19. <https://doi.org/10.18632/oncotarget.3751>.
  43. Madoz-Gúrpide J, Zazo S, Chamizo C, Casado V, Caramés C, Gavín E, Cristóbal I, García-Foncillas J, Rojo F. Activation of MET pathway predicts poor outcome to cetuximab in patients with recurrent or metastatic head and neck cancer. *J Transl Med*. 2015; 13:282.
  44. Qian G, Wang D, Magliocca KR, Hu Z, Nannapaneni S, Kim S, Chen Z, Sun SY, Shin DM, Saba NF, Chen ZG. Human papillomavirus oncoprotein E6 upregulates c-Met through p53 downregulation. *Eur J Cancer*. 2016; 65:21–32.
  45. Cho YA, Kim EK, Heo SJ, Cho BC, Kim HR, Chung JM, Yoon SO. Alteration status and prognostic value of MET in head and neck squamous cell carcinoma. *J Cancer*. 2016; 7:2197–206.
  46. Argiris A, Ghebremichael M, Gilbert J, Lee JW, Sachidanandam K, Kolesar JM, Burtness B, Forastiere AA. Phase III randomized, placebo-controlled trial of docetaxel with or without gefitinib in recurrent or metastatic head and neck cancer: an eastern cooperative oncology group trial. *J Clin Oncol*. 2013; 31:1405–14.
  47. Seiwert TY, Jagadeeswaran R, Faoro L, Janamanchi V, Nallasura V, El Dinali M, Yala S, Kanteti R, Cohen EE, Lingen MW, Martin L, Krishnaswamy S, Klein-Szanto



- A, et al. The MET receptor tyrosine kinase is a potential novel therapeutic target for head and neck squamous cell carcinoma. *Cancer Res.* 2009; 69:3021–31.
48. Peters S, Adjei AA. MET: a promising anticancer therapeutic target. *Nat Rev Clin Oncol.* 2012; 9:314–26.
  49. Seiwert T, Sarantopoulos J, Kallender H, McCallum S, Keer HN, Blumenschein G Jr. Phase II trial of single-agent foretinib (GSK1363089) in patients with recurrent or metastatic squamous cell carcinoma of the head and neck. *Invest New Drugs.* 2013; 31:417–24.
  50. Choueiri TK, Vaishampayan U, Rosenberg JE, Logan TF, Harzstark AL, Bukowski RM, Rini BI, Srinivas S, Stein MN, Adams LM, Ottesen LH, Laubscher KH, Sherman L, et al. Phase II and biomarker study of the dual MET/VEGFR2 inhibitor foretinib in patients with papillary renal cell carcinoma. *J Clin Oncol.* 2013; 31:181–6.
  51. Scagliotti G, von Pawel J, Novello S, Ramlau R, Favaretto A, Barlesi F, Akerley W, Orlov S, Santoro A, Spigel D, Hirsh V, Shepherd FA, Sequist LV, et al. Phase III multinational, randomized, double-blind, placebo-controlled study of tivantinib (ARQ 197) plus erlotinib versus erlotinib alone in previously treated patients with locally advanced or metastatic nonsquamous non-small-cell lung cancer. *J Clin Oncol.* 2015; 33:2667–74.
  52. Santoro A, Rimassa L, Borbath I, Daniele B, Salvagni S, Van Laethem JL, Van Vlierberghe H, Trojan J, Kolligs FT, Weiss A, Miles S, Gasbarrini A, Lencioni M, et al. Tivantinib for second-line treatment of advanced hepatocellular carcinoma: a randomised, placebo-controlled phase 2 study. *Lancet Oncol.* 2013; 14:55–63.
  53. Ang KK, Berkey BA, Tu X, Zhang HZ, Katz R, Hammond EH, Fu KK, Milas L. Impact of epidermal growth factor receptor expression on survival and pattern of relapse in patients with advanced head and neck carcinoma. *Cancer Res.* 2002; 62:7350–6.
  54. Stabile LP, He G, Lui VW, Thomas S, Henry C, Gubish CT, Joyce S, Quesnelle KM, Siegfried JM, Grandis JR. c-Src activation mediates erlotinib resistance in head and neck cancer by stimulating c-Met. *Clin Cancer Res.* 2013; 19:380–92.
  55. Krumbach R, Schuler J, Hofmann M, Gieseemann T, Fiebig HH, Beckers T. Primary resistance to cetuximab in a panel of patient-derived tumour xenograft models: activation of MET as one mechanism for drug resistance. *Eur J Cancer.* 2011; 47:1231–43.
  56. Xu H, Stabile LP, Gubish CT, Gooding WE, Grandis JR, Siegfried JM. Dual blockade of EGFR and c-Met abrogates redundant signaling and proliferation in head and neck carcinoma cells. *Clin Cancer Res.* 2011; 17:4425–38.
  57. Akervall J, Guo X, Qian CN, Schoumans J, Leeser B, Kort E, Cole A, Resau J, Bradford C, Carey T, Wennerberg J, Anderson H, Tennvall J, et al. Genetic and expression profiles of squamous cell carcinoma of the head and neck correlate with cisplatin sensitivity and resistance in cell lines and patients. *Clin Cancer Res.* 2004; 10:8204–13.
  58. Panic N, Leoncini E, de Belvis G, Ricciardi W, Boccia S. Evaluation of the endorsement of the preferred reporting items for systematic reviews and meta-analysis (PRISMA) statement on the quality of published systematic review and meta-analyses. *PLoS One.* 2013; 8:e83138.
  59. Sterne JA, Sutton AJ, Ioannidis JP, Terrin N, Jones DR, Lau J, Carpenter J, Rücker G, Harbord RM, Schmid CH, Tetzlaff J, Deeks JJ, Peters J, et al. Recommendations for examining and interpreting funnel plot asymmetry in meta-analyses of randomised controlled trials. *BMJ.* 2011; 343:d4002.
